# Supplementary material for: Increased Fetal Thymocytes Apoptosis Contributes to Prenatal Nicotine Exposure-induced Th1/Th2 Imbalance in Male Offspring Mice
Source: PubMed Central journal article supplement (PMC5157046; doi:10.1038/srep39013), 2016-12-15
Supplement: srep39013-s1.pdf [file srep39013-s1.pdf]

## **Title page**

# **Increased Fetal Thymocytes Apoptosis Contributes to Prenatal Nicotine Exposure-induced Th1/Th2 Imbalance in Male Offspring Mice**

**Ting Chen<sup>+</sup>, You-e Yan<sup>+</sup>, Sha Liu, Han-xiao Liu, Hui-yi Yan, Li-fang Hou, Wen Qu  
& Jie Ping\***

*Department of Pharmacology, Wuhan University School of Basic Medical Sciences,  
Wuhan 430071, China.*

**\*Corresponding author: Jie Ping**

Address: 185, Donghu Road, Wuhan 430071, China.

Tel.: +86 27 6875 8665.

Fax: +86 27 8733 1670.

E-mail: pingjie@whu.edu.cn

**+These authors contributed equally to this work.**

## Supplementary Figure S1

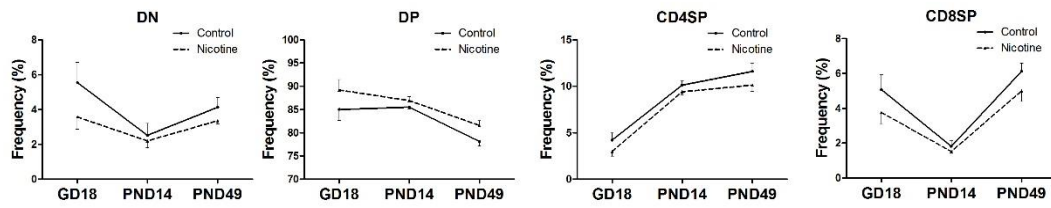

Supplementary Figure S1. The thymocyte phenotypes in male offspring at different time points. DN, double negative cell; DP, double positive cell; SP, single positive cell; GD, gestational day; PND, postnatal day.

## Supplementary Figure S2

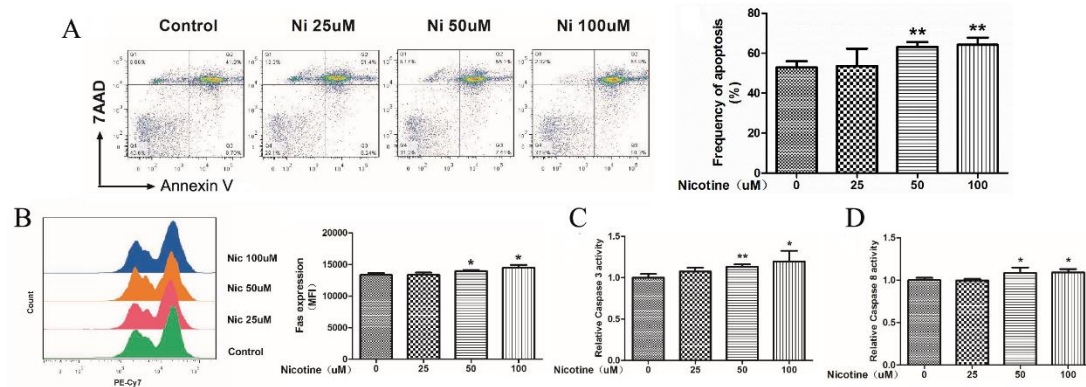

Supplementary Figure S2. Effects of nicotine (25, 50 and 100  $\mu$ M) on cell apoptosis, Fas expression, caspase 3 and caspase 8 activity in primary thymus cells. Thymus cells were prepared from weaned BALB/c mice and cultured with different concentrations of nicotine for 48 h. A. Cell apoptosis was detected by flow cytometry; B. Protein expression of Fas on the surface of thymus cells; C and D: caspase 3 and caspase 8 activity in thymus cells. Mean  $\pm$  SD, n=6. \* $P$ <0.05, \*\* $P$ <0.01 vs control.

## *Supplementary Table 1*

**Supplementary Table 1. Oligonucleotide primers and PCR conditions of mouse in quantitative real-time PCR.**

| Genes           | Forward primer          | Reverse primer         | Product (bp) | Annealing   |
|-----------------|-------------------------|------------------------|--------------|-------------|
| $\alpha 7nAChR$ | CACATTCCACACCAACGTCTT   | AAAAGGGAACCAGCGTACATC  | 106          | 60°C, 30 s  |
| Bim             | CCGGAGATACGGATTGCACAG   | CAGCCTCGCGGTAATCATTG   | 97           | 60°C, 30 s  |
| Caspase-3       | CGTGGTTCATCCAGTCCCTTT   | ATTCCGTTGCCACCTTCCT    | 102          | 60°C, 30 s  |
| Caspase-8       | AGGTACTCGGCCACAGGTTA    | TGGGATGTAGTCCAAGCACA   | 137          | 60°C, 30 s  |
| Fas             | ATGCACACTCTGCGATGAAG    | CAGTGTTACAGCCAGGAGA    | 120          | 60°C, 30 s  |
| FasL            | GCAGAAGGAACTGGCAGAAC    | TTAAATGGGCCCACTCCTC    | 128          | 60°C, 30 s  |
| GAPDH           | AACTTTGGCATTGTGGAAGG    | GGATGCAGGGATGATGTCT    | 132          | 60°C, 30 s  |
| IFN- $\gamma$   | CTCAAGTGGCATAGATGTGGAAG | GATGGCCTGATTGTCTTTCAAG | 120          | 60°C, 30 s  |
| IL-4            | ATGGATGTGCCAAACGTCTT    | AAGCACCTTGAAGCCCTAC    | 78           | 58°C, 30 s; |
